# Supplementary material
Source: MDPI journal article supplement (https://www.mdpi.com/2073-4344/13/5/895)
Supplement: s1 [file s1]

## Supplementary Material

# Ordered mesoporous TiO<sub>2</sub>: The effect of structure, residual template and metal doping on photocatalytic activity

Ahmed M. Mohammed <sup>1,2</sup>, Ahmet E. Becerikli<sup>3</sup>, Simon Ristig <sup>3</sup>, Norbert Steinfeldt <sup>1</sup> and Jennifer Strunk <sup>1,\*</sup>

<sup>1</sup> Department of Chemistry , College of Education for Girls, University of Mosul, Iraq.

<sup>2</sup> Leibniz Institute for Catalysis, Albert-Einstein-Str. 29a, 18059 Rostock

<sup>3</sup> Max Planck Institute for Chemical Energy Conversion, Stiftstraße 34-36, 45470 Mülheim an der Ruhr

\* Correspondence: Jennifer.strunk@catalysis.de; Tel.: +49 381 1281 375

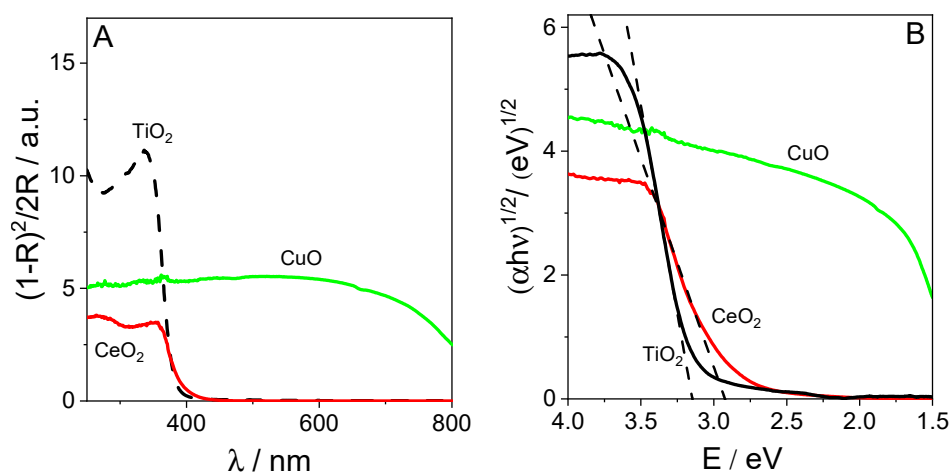

**Figure S1.** UV/Vis DRS spectra of pure P25, CeO<sub>2</sub>, and CuO.

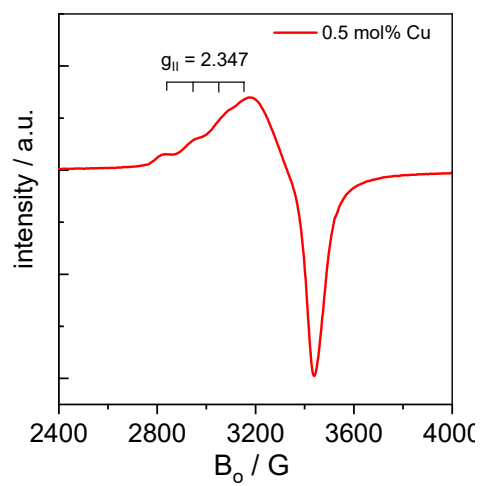

**Figure S2.** Room temperature EPR spectrum of 0.5mol% Cu/TiO<sub>2</sub>.

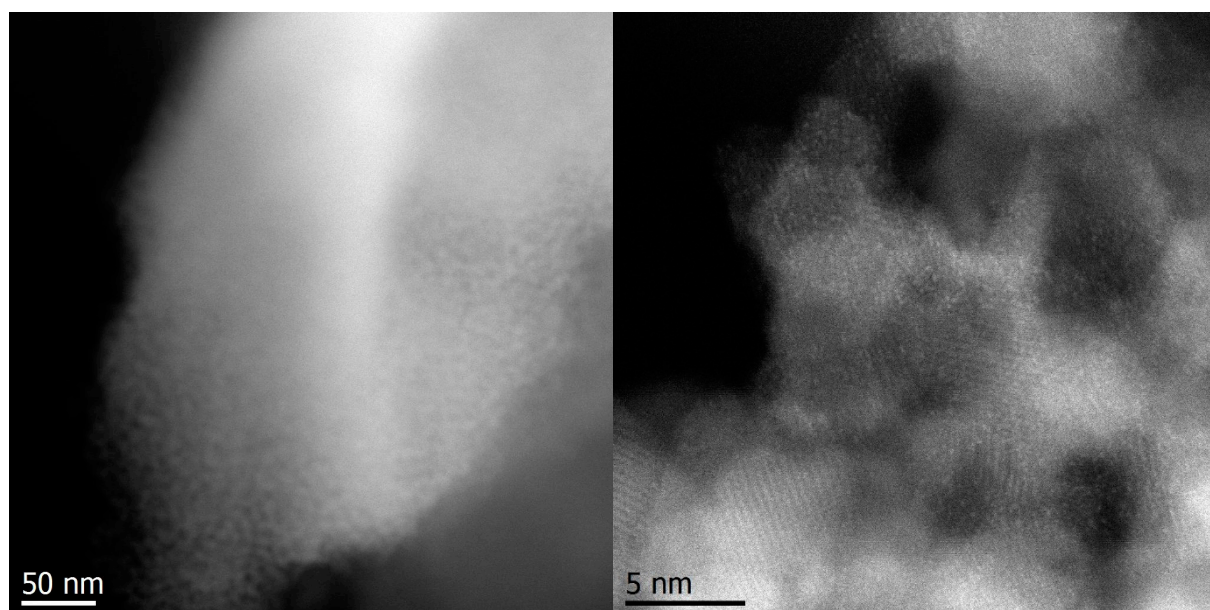

**Figure S3.** HAADF-STEM images of 0.5 mol% Ce/TiO<sub>2</sub> using two different magnifications

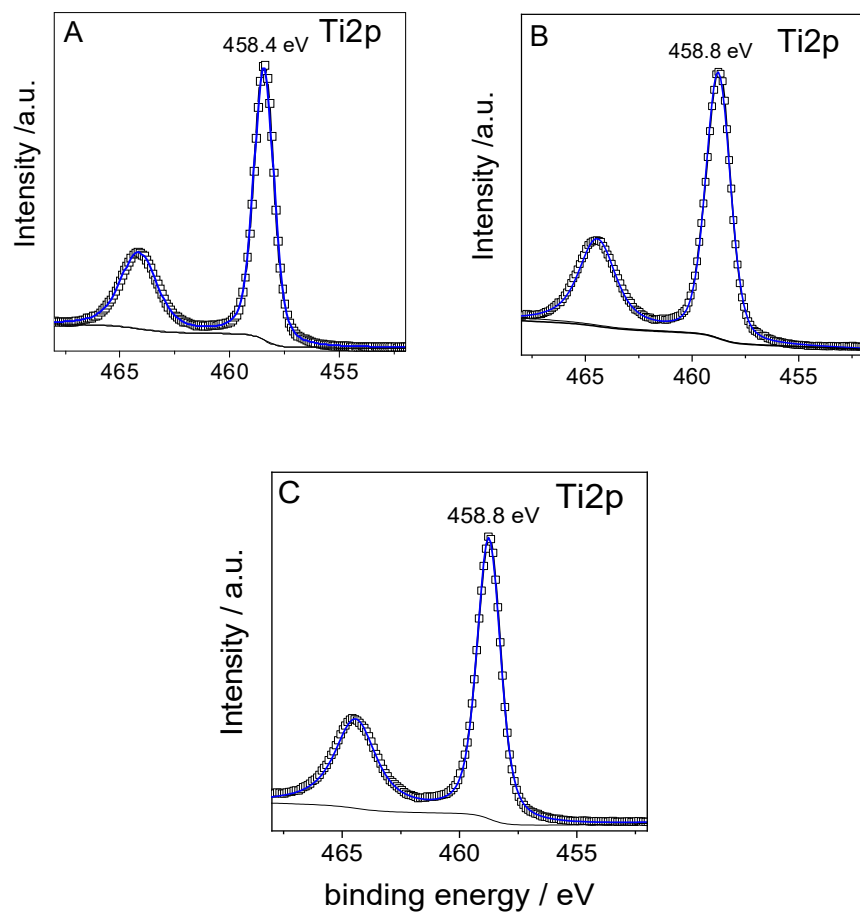

**Figure S4.** Ti 2p XP spectra of A) om-TiO<sub>2</sub>, B) 0.5mol% Cu/TiO<sub>2</sub>, and C) 0.5mol% Cu/TiO<sub>2</sub>.

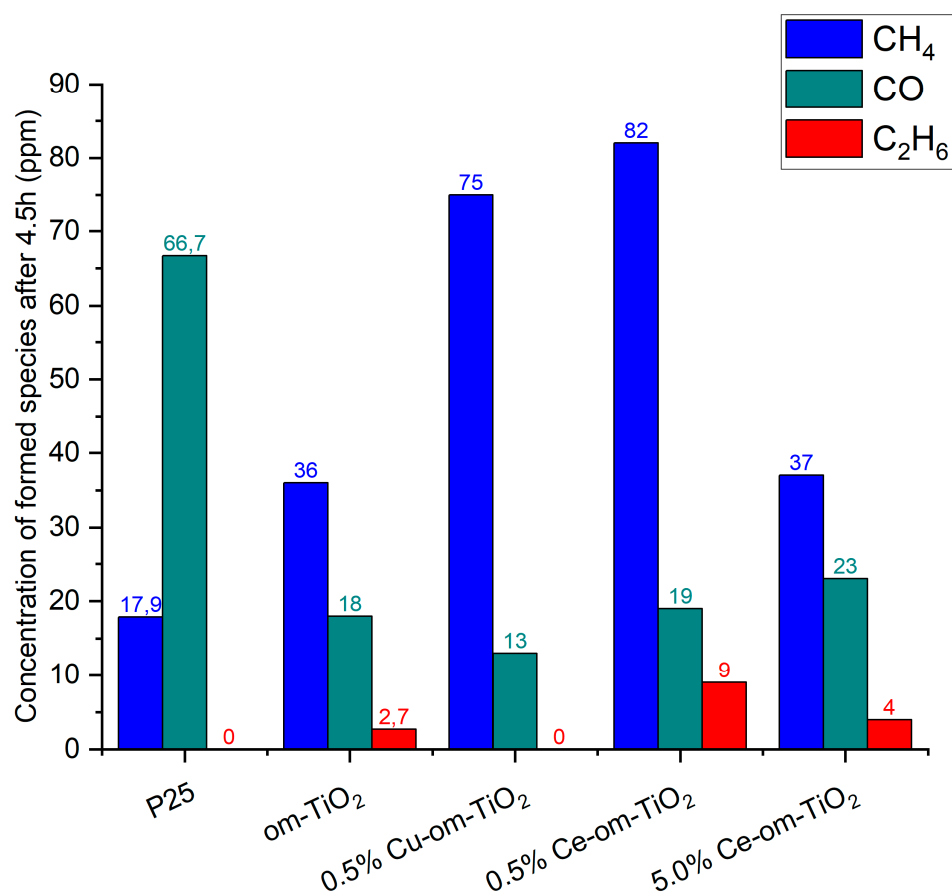

**Figure S5.** Overview over formed carbon-containing species on various samples.
